# Supplementary material for: Phenotypic Landscape of Saccharomyces cerevisiae during Wine Fermentation: Evidence for Origin-Dependent Metabolic Traits
Source: PubMed Central journal article supplement (PMC3174997; doi:10.1371/journal.pone.0025147), 2011-09-16
Supplement: pone.0025147.s004.pdf [file pone.0025147.s004.pdf]

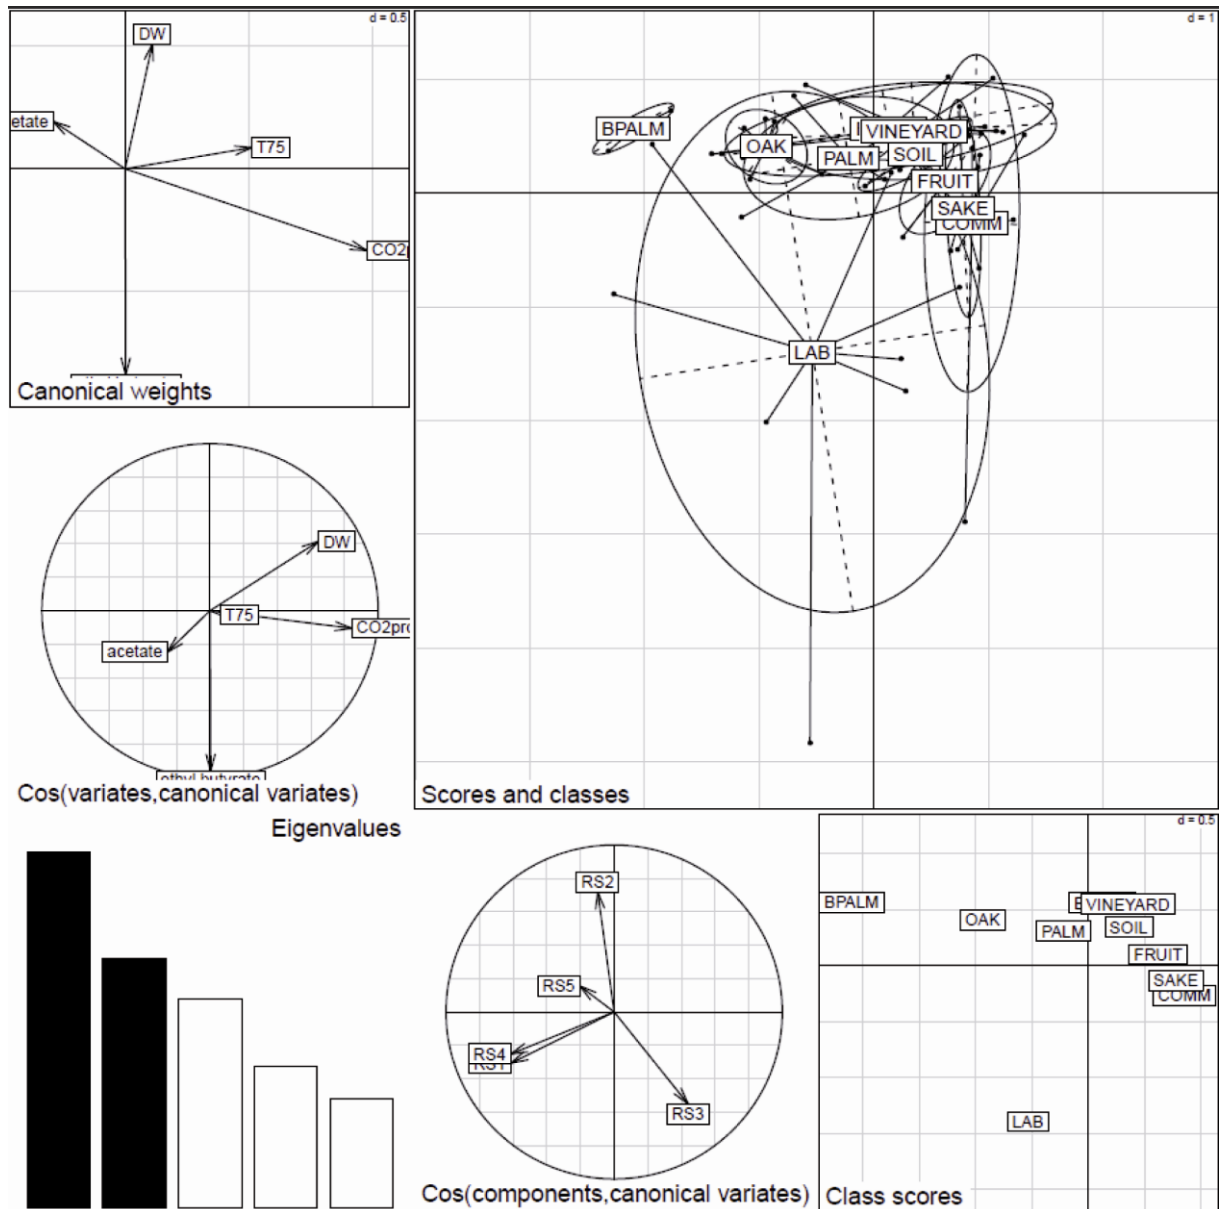

**Figure S4: Strain origin-dependent characterization of *S. cerevisiae* population on the basis of phenotypes.** Linear discriminant analysis was carried out on the selected phenotypic variables (dry weight, T<sub>75</sub>, CO<sub>2F</sub>, acetate and ethyl butyrate) for the description of the strains depending on their origin.
