# Supplementary material for: Phenotypic Landscape of Saccharomyces cerevisiae during Wine Fermentation: Evidence for Origin-Dependent Metabolic Traits
Source: PubMed Central journal article supplement (PMC3174997; doi:10.1371/journal.pone.0025147), 2011-09-16
Supplement: pone.0025147.s005.pdf [file pone.0025147.s005.pdf]

**Table SI. Intra-class correlation coefficient (ICC) of the 21 strains which have been grown under wine fermentation conditions at least in duplicate.**

| Parameter        | Between-strain<br>Variance | Within-strain<br>Variance | ICC (%) |
|------------------|----------------------------|---------------------------|---------|
| Cell number      | 1219.5                     | 26.6                      | 97.9    |
| Dry weight       | 0.706                      | 0.033                     | 95.6    |
| V <sub>max</sub> | 0.110                      | 0.006                     | 95.1    |
| CO <sub>2F</sub> | 128.0                      | 11.7                      | 91.6    |
| T <sub>75</sub>  | 12024.7                    | 145.0                     | 98.8    |
| Succinate        | 0.092                      | 0.004                     | 96.1    |
| Glycerol         | 2.524                      | 0.086                     | 96.7    |
| Acetate          | 0.126                      | 0.003                     | 97.8    |
| Pyruvate         | 0.00086                    | 0.000083                  | 91.3    |
| Isobutanol       | 207.4                      | 14.3                      | 93.6    |
| Isobutyl.acetate | 0.0023                     | 0.000033                  | 98.6    |
| Isoamyl.alcohol  | 6992.5                     | 77.6                      | 98.9    |
| Isoamyl Acetate. | 1.093                      | 0.016                     | 98.5    |
| Ethyl acetate    | 76.4                       | 3.2                       | 96.0    |
| Ethyl butyrate   | 0.004                      | 0.001                     | 85.7    |
| Ethyl hexanoate  | 0.0059                     | 0.00021                   | 96.5    |
| Ethyl octanoate  | 0.035                      | 0.002                     | 94.2    |
