# Supplementary material for: Phenotypic Landscape of Saccharomyces cerevisiae during Wine Fermentation: Evidence for Origin-Dependent Metabolic Traits
Source: PubMed Central journal article supplement (PMC3174997; doi:10.1371/journal.pone.0025147), 2011-09-16
Supplement: pone.0025147.s006.pdf [file pone.0025147.s006.pdf]

**Table S2. Correlation analysis between the 18 phenotypic traits within the population of 72 stains.** Pearson's Product Moment correlation coefficients.

|                   | Cell number | Dry weight  | V <sub>max</sub> | CO <sub>2F</sub> | T <sub>75</sub> | T <sub>50</sub> | V <sub>50</sub> | Succinate   | Glycerol    | Acetate      | Isobutanol  | Isobutyl. acetate | Isoamyl alcohol | Isoamyl acetate | Ethyl. acetate | Ethyl. butyrate | Ethyl. hexanoate | Ethyl. octanoate |
|-------------------|-------------|-------------|------------------|------------------|-----------------|-----------------|-----------------|-------------|-------------|--------------|-------------|-------------------|-----------------|-----------------|----------------|-----------------|------------------|------------------|
| Cell number       | <i>1.00</i> | 0.31        | 0.37             | 0.23             | -0.32           | -0.36           | 0.24            | -0.07       | -0.23       | -0.32        | 0.03        | -0.21             | 0.10            | -0.24           | -0.35          | -0.05           | 0.01             | 0.02             |
| Dry weight        | 0.31        | <i>1.00</i> | 0.25             | <b>0.71</b>      | -0.47           | -0.47           | 0.35            | 0.02        | -0.29       | -0.34        | 0.35        | 0.12              | 0.37            | 0.19            | 0.01           | -0.24           | 0.28             | 0.24             |
| V <sub>max</sub>  | 0.37        | 0.25        | <i>1.00</i>      | 0.03             | <b>-0.52</b>    | <b>-0.73</b>    | <b>0.48</b>     | 0.30        | -0.21       | -0.56        | 0.03        | 0.14              | 0.50            | 0.33            | -0.26          | -0.50           | 0.16             | 0.31             |
| CO <sub>2F</sub>  | 0.23        | <b>0.71</b> | 0.03             | <i>1.00</i>      | -0.46           | -0.35           | 0.34            | -0.05       | -0.19       | -0.10        | 0.26        | 0.07              | 0.09            | 0.16            | 0.10           | 0.14            | 0.12             | -0.08            |
| T <sub>75</sub>   | -0.32       | -0.47       | <b>-0.52</b>     | -0.46            | <i>1.00</i>     | <b>0.92</b>     | <b>-0.81</b>    | -0.15       | 0.24        | 0.27         | -0.12       | -0.23             | -0.28           | -0.26           | 0.04           | -0.03           | 0.03             | -0.15            |
| T <sub>50</sub>   | -0.36       | -0.47       | <b>-0.73</b>     | -0.35            | <b>0.92</b>     | <i>1.00</i>     | <b>-0.78</b>    | -0.21       | 0.34        | 0.42         | -0.12       | -0.27             | -0.37           | -0.32           | 0.06           | 0.11            | -0.04            | -0.23            |
| V <sub>50</sub>   | 0.24        | 0.35        | <b>0.48</b>      | 0.34             | <b>-0.81</b>    | <b>-0.78</b>    | <i>1.00</i>     | 0.27        | -0.11       | -0.30        | -0.02       | 0.37              | 0.21            | 0.40            | 0.16           | 0.02            | -0.04            | 0.23             |
| Succinate         | -0.07       | 0.02        | 0.30             | -0.05            | -0.15           | -0.21           | 0.27            | <i>1.00</i> | 0.55        | -0.18        | 0.02        | 0.31              | 0.32            | 0.39            | 0.20           | -0.22           | -0.09            | 0.08             |
| Glycerol          | -0.23       | -0.29       | -0.21            | -0.19            | 0.24            | 0.34            | -0.11           | 0.55        | <i>1.00</i> | 0.29         | -0.04       | 0.23              | -0.05           | 0.12            | 0.18           | -0.01           | -0.12            | -0.12            |
| Acetate           | -0.32       | -0.34       | -0.56            | -0.10            | 0.27            | 0.42            | -0.30           | -0.18       | 0.29        | <i>1.00</i>  | -0.11       | -0.03             | <b>-0.66</b>    | -0.30           | 0.15           | 0.31            | -0.27            | -0.11            |
| Isobutanol        | 0.03        | 0.35        | 0.03             | 0.26             | -0.12           | -0.12           | -0.02           | 0.02        | -0.04       | -0.11        | <i>1.00</i> | 0.45              | 0.40            | 0.10            | 0.03           | -0.13           | 0.07             | 0.06             |
| Isobutyl. acetate | -0.21       | 0.12        | 0.14             | 0.07             | -0.23           | -0.27           | 0.37            | 0.31        | 0.23        | -0.03        | 0.45        | <i>1.00</i>       | 0.17            | <b>0.51</b>     | <b>0.44</b>    | -0.14           | -0.08            | 0.31             |
| Isoamyl. alcohol  | 0.10        | 0.37        | 0.50             | 0.09             | -0.28           | -0.37           | 0.21            | 0.32        | -0.05       | <b>-0.66</b> | 0.40        | 0.17              | <i>1.00</i>     | <b>0.49</b>     | -0.14          | -0.39           | 0.34             | 0.23             |
| Isoamyl. acetate  | -0.24       | 0.19        | 0.33             | 0.16             | -0.26           | -0.32           | 0.40            | 0.39        | 0.12        | -0.30        | 0.10        | <b>0.51</b>       | <b>0.49</b>     | <i>1.00</i>     | <b>0.51</b>    | -0.16           | 0.31             | 0.07             |
| Ethyl acetate     | -0.35       | 0.01        | -0.26            | 0.10             | 0.04            | 0.06            | 0.16            | 0.20        | 0.18        | 0.15         | 0.03        | <b>0.44</b>       | -0.14           | <b>0.51</b>     | <i>1.00</i>    | 0.10            | 0.07             | 0.00             |
| Ethyl butyrate    | -0.05       | -0.24       | -0.50            | 0.14             | -0.03           | 0.11            | 0.02            | -0.22       | -0.01       | 0.31         | -0.13       | -0.14             | -0.39           | -0.16           | 0.10           | <i>1.00</i>     | -0.27            | -0.21            |
| Ethyl hexanoate   | 0.01        | 0.28        | 0.16             | 0.12             | 0.03            | -0.04           | -0.04           | -0.09       | -0.12       | -0.27        | 0.07        | -0.08             | 0.34            | 0.31            | 0.07           | -0.27           | <i>1.00</i>      | -0.04            |
| Ethyl octanoate   | 0.02        | 0.24        | 0.31             | -0.08            | -0.15           | -0.23           | 0.23            | 0.08        | -0.12       | -0.11        | 0.06        | 0.31              | 0.23            | 0.07            | 0.00           | -0.21           | -0.04            | <i>1.00</i>      |
