# Supplementary material for: Phenotypic Landscape of Saccharomyces cerevisiae during Wine Fermentation: Evidence for Origin-Dependent Metabolic Traits
Source: PubMed Central journal article supplement (PMC3174997; doi:10.1371/journal.pone.0025147), 2011-09-16
Supplement: pone.0025147.s007.pdf [file pone.0025147.s007.pdf]

**Table S3. Correlations between variables within the whole population (72 strains).** Pearson's Product Moment correlation coefficients with p-values corrected for multiple testing using Benjamini-Hochberg methods (BH).

| Name                             | r     | rawp       | BH         |
|----------------------------------|-------|------------|------------|
| T75-V50                          | -0.81 | 3.38E-18   | 5.18E-16   |
| T75-T50                          | 0.92  | 2.20E-16   | 1.68E-14   |
| T50-V50                          | -0.78 | 5.20E-16   | 2.65E-14   |
| Vmax-T50                         | -0.73 | 2.31E-13   | 8.84E-12   |
| DW-CO2produced                   | 0.71  | 8.38E-12   | 2.56E-10   |
| acetate-isoamyl.alcohol          | -0.66 | 2.60E-10   | 6.62E-09   |
| Vmax-acetate                     | -0.56 | 2.82E-07   | 6.17E-06   |
| succinate-glycerol               | 0.55  | 4.46E-07   | 8.54E-06   |
| Vmax-T75                         | -0.52 | 2.51E-06   | 4.26E-05   |
| isobutyl.acetate-isoamyl.acetate | 0.51  | 5.48E-06   | 8.39E-05   |
| Vmax-isoamyl.alcohol             | 0.50  | 7.25E-06   | 9.24E-05   |
| isoamyl.acetate-ethyl.acetate    | 0.51  | 6.81E-06   | 9.24E-05   |
| Vmax-ethyl.butyrate              | -0.50 | 8.72E-06   | 0.00010268 |
| isoamyl.alcohol-isoamyl.acetate  | 0.49  | 1.71E-05   | 0.00018673 |
| Vmax-V50                         | 0.48  | 2.26E-05   | 0.00023042 |
| DW-T75                           | -0.47 | 4.80E-05   | 0.0004082  |
| DW-T50                           | -0.47 | 4.75E-05   | 0.0004082  |
| CO2produced-T75                  | -0.46 | 4.49E-05   | 0.0004082  |
| isobutanol-isobutyl.acetate      | 0.45  | 8.73E-05   | 0.00070306 |
| isobutyl.acetate-ethyl.acetate   | 0.44  | 0.00012165 | 0.00093065 |
| T50-acetate                      | 0.42  | 0.00022658 | 0.00165078 |
| V50-isoamyl.acetate              | 0.40  | 0.0004884  | 0.00339661 |
| isobutanol-isoamyl.alcohol       | 0.40  | 0.00059406 | 0.0039518  |
| succinate-isoamyl.acetate        | 0.39  | 0.0006962  | 0.00426077 |
| isoamyl.alcohol-ethyl.butyrate   | -0.39 | 0.00067902 | 0.00426077 |
| V50-isobutyl.acetate             | 0.37  | 0.0014847  | 0.00873687 |
| T50-isoamyl.alcohol              | -0.37 | 0.0016531  | 0.00936754 |
| DW-isoamyl.alcohol               | 0.37  | 0.00173962 | 0.00950581 |
| population-Vmax                  | 0.37  | 0.00219919 | 0.01160262 |
| CO2produced-T50                  | -0.35 | 0.00242471 | 0.01236601 |
| DW-V50                           | 0.35  | 0.00258486 | 0.01275754 |
| DW-isobutanol                    | 0.35  | 0.00318203 | 0.0152141  |
| population-T50                   | -0.36 | 0.00346207 | 0.01582771 |
| T50-glycerol                     | 0.34  | 0.00351727 | 0.01582771 |
| DW-acetate                       | -0.34 | 0.00368032 | 0.01608825 |
| CO2produced-V50                  | 0.34  | 0.00381292 | 0.0162049  |
| population-ethyl.acetate         | -0.35 | 0.00409832 | 0.01694709 |
| isoamyl.alcohol-ethyl.hexanoate  | 0.34  | 0.00421404 | 0.01696705 |
| Vmax-isoamyl.acetate             | 0.33  | 0.00444669 | 0.01744472 |
| T50-isoamyl.acetate              | -0.32 | 0.00609248 | 0.02330373 |

|                                  |       |            |            |
|----------------------------------|-------|------------|------------|
| Vmax-ethyl.octanoate             | 0.31  | 0.00756637 | 0.0269524  |
| succinate-isoamyl.alcohol        | 0.32  | 0.00726073 | 0.0269524  |
| acetate-ethyl.butyrate           | 0.31  | 0.00757486 | 0.0269524  |
| isoamyl.acetate-ethyl.hexanoate  | 0.31  | 0.00791331 | 0.02751674 |
| population-T75                   | -0.32 | 0.00938806 | 0.02953627 |
| population-acetate               | -0.32 | 0.00879644 | 0.02953627 |
| Vmax-succinate                   | 0.30  | 0.00962104 | 0.02953627 |
| V50-acetate                      | -0.30 | 0.00965238 | 0.02953627 |
| succinate-isobutyl.acetate       | 0.31  | 0.00943373 | 0.02953627 |
| isobutyl.acetate-ethyl.octanoate | 0.31  | 0.00888196 | 0.02953627 |
| acetate-isoamyl.acetate          | -0.30 | 0.01041965 | 0.03125894 |
| population-DW                    | 0.31  | 0.01148029 | 0.03377854 |
| glycerol-acetate                 | 0.29  | 0.01329906 | 0.03839161 |
| DW-glycerol                      | -0.29 | 0.01567506 | 0.04441268 |
| T75-isoamyl.alcohol              | -0.28 | 0.01741277 | 0.04843916 |
| DW-ethyl.hexanoate               | 0.28  | 0.0178101  | 0.04865973 |
| T75-acetate                      | 0.27  | 0.01953355 | 0.05243216 |
| V50-succinate                    | 0.27  | 0.0205365  | 0.05417386 |
| ethyl.butyrate-ethyl.hexanoate   | -0.27 | 0.02130352 | 0.05524472 |
| T50-isobutyl.acetate             | -0.27 | 0.02450537 | 0.0615924  |
| acetate-ethyl.hexanoate          | -0.27 | 0.02455645 | 0.0615924  |
| Vmax-ethyl.acetate               | -0.26 | 0.03012444 | 0.07433935 |
| CO2produced-isobutanol           | 0.26  | 0.03106173 | 0.07543563 |
| T75-isoamyl.acetate              | -0.26 | 0.03166574 | 0.0757009  |
| DW-Vmax                          | 0.25  | 0.03379292 | 0.07954334 |
| DW-ethyl.octanoate               | 0.24  | 0.04108357 | 0.09523919 |
| DW-ethyl.butyrate                | -0.24 | 0.04568613 | 0.1027938  |
| T75-glycerol                     | 0.24  | 0.04522077 | 0.1027938  |
| T75-isobutyl.acetate             | -0.23 | 0.05123216 | 0.11304992 |
| isoamyl.alcohol-ethyl.octanoate  | 0.23  | 0.05172218 | 0.11304992 |
| population-isoamyl.acetate       | -0.24 | 0.05446135 | 0.11573036 |
| T50-ethyl.octanoate              | -0.23 | 0.05400456 | 0.11573036 |
| V50-ethyl.octanoate              | 0.23  | 0.05558368 | 0.11649729 |
| population-V50                   | 0.24  | 0.05926318 | 0.12089689 |
| glycerol-isobutyl.acetate        | 0.23  | 0.05916566 | 0.12089689 |
| succinate-ethyl.butyrate         | -0.22 | 0.06077358 | 0.12234681 |
| population-glycerol              | -0.23 | 0.06223834 | 0.12366838 |
| population-CO2produced           | 0.23  | 0.0659703  | 0.12940328 |
| Vmax-glycerol                    | -0.21 | 0.07228952 | 0.14000376 |
| T50-succinate                    | -0.21 | 0.08252405 | 0.15591353 |
| V50-isoamyl.alcohol              | 0.21  | 0.08254246 | 0.15591353 |
| ethyl.butyrate-ethyl.octanoate   | -0.21 | 0.08559831 | 0.15971392 |
| population-isobutyl.acetate      | -0.21 | 0.09639699 | 0.17769565 |
| succinate-ethyl.acetate          | 0.20  | 0.10175253 | 0.18533497 |

|                                      |       |            |            |
|--------------------------------------|-------|------------|------------|
| CO2produced-glycerol                 | -0.19 | 0.10852111 | 0.19533799 |
| DW-isoamyl.acetate                   | 0.19  | 0.11131124 | 0.19803047 |
| succinate-acetate                    | -0.18 | 0.12317648 | 0.2166207  |
| glycerol-ethyl.acetate               | 0.18  | 0.14074051 | 0.24469657 |
| isobutyl.acetate-<br>isoamyl.alcohol | 0.17  | 0.147897   | 0.25424989 |
| isoamyl.acetate-ethyl.butyrate       | -0.16 | 0.17042245 | 0.28971816 |
| CO2produced-isoamyl.acetate          | 0.16  | 0.19073275 | 0.32068254 |
| Vmax-ethyl.hexanoate                 | 0.16  | 0.19507336 | 0.32092714 |
| V50-ethyl.acetate                    | 0.16  | 0.1936902  | 0.32092714 |
| T75-ethyl.octanoate                  | -0.15 | 0.19996653 | 0.32547743 |
| T75-succinate                        | -0.15 | 0.21581662 | 0.34757835 |
| acetate-ethyl.acetate                | 0.15  | 0.2237751  | 0.35664156 |
| isobutyl.acetate-ethyl.butyrate      | -0.14 | 0.23725206 | 0.37422232 |
| isoamyl.alcohol-ethyl.acetate        | -0.14 | 0.24169676 | 0.3773429  |
| CO2produced-ethyl.butyrate           | 0.14  | 0.24514717 | 0.3788638  |
| Vmax-isobutyl.acetate                | 0.14  | 0.25507418 | 0.39026349 |
| isobutanol-ethyl.butyrate            | -0.13 | 0.29132845 | 0.44131933 |
| T50-isobutanol                       | -0.12 | 0.3025663  | 0.45384945 |
| DW-isobutyl.acetate                  | 0.12  | 0.31732861 | 0.4668392  |
| glycerol-ethyl.octanoate             | -0.12 | 0.31681015 | 0.4668392  |
| glycerol-ethyl.hexanoate             | -0.12 | 0.32171448 | 0.46878395 |
| T75-isobutanol                       | -0.12 | 0.33034625 | 0.47682054 |
| CO2produced-ethyl.hexanoate          | 0.12  | 0.33828681 | 0.47923965 |
| glycerol-isoamyl.acetate             | 0.12  | 0.33737968 | 0.47923965 |
| T50-ethyl.butyrate                   | 0.11  | 0.34578264 | 0.48536462 |
| acetate-isobutanol                   | -0.11 | 0.35849713 | 0.49863691 |
| acetate-ethyl.octanoate              | -0.11 | 0.36748686 | 0.50653594 |
| V50-glycerol                         | -0.11 | 0.38002972 | 0.51914774 |
| ethyl.acetate-ethyl.butyrate         | 0.10  | 0.38901179 | 0.52671507 |
| CO2produced-ethyl.acetate            | 0.10  | 0.4072248  | 0.54653855 |
| CO2produced-acetate                  | -0.10 | 0.41347836 | 0.55010599 |
| population-isoamyl.alcohol           | 0.10  | 0.42479272 | 0.55549817 |
| isobutanol-isoamyl.acetate           | 0.10  | 0.42221167 | 0.55549817 |
| CO2produced-isoamyl.alcohol          | 0.09  | 0.45507908 | 0.59006017 |
| succinate-ethyl.hexanoate            | -0.09 | 0.46387949 | 0.59641648 |
| CO2produced-ethyl.octanoate          | -0.08 | 0.49788593 | 0.62819382 |
| succinate-ethyl.octanoate            | 0.08  | 0.50091272 | 0.62819382 |
| isobutyl.acetate-<br>ethyl.hexanoate | -0.08 | 0.50070306 | 0.62819382 |
| CO2produced-isobutyl.acetate         | 0.07  | 0.537593   | 0.66871324 |
| ethyl.acetate-ethyl.hexanoate        | 0.07  | 0.54969501 | 0.67825271 |
| isoamyl.acetate-<br>ethyl.octanoate  | 0.07  | 0.57866819 | 0.70828986 |
| isobutanol-ethyl.hexanoate           | 0.07  | 0.58951677 | 0.71584179 |
| population-succinate                 | -0.07 | 0.60541354 | 0.72935647 |
| isobutanol-ethyl.octanoate           | 0.06  | 0.6103416  | 0.72954894 |

|                                 |       |            |            |
|---------------------------------|-------|------------|------------|
| T50-ethyl.acetate               | 0.06  | 0.61750631 | 0.7323912  |
| CO2produced-succinate           | -0.05 | 0.65953374 | 0.77622048 |
| population-ethyl.butyrate       | -0.05 | 0.66826552 | 0.78049332 |
| glycerol-isoamyl.alcohol        | -0.05 | 0.69454248 | 0.80503787 |
| Vmax-isobutanol                 | 0.03  | 0.77729963 | 0.85558881 |
| T75-ethyl.acetate               | 0.04  | 0.77095708 | 0.85558881 |
| T50-ethyl.hexanoate             | -0.04 | 0.76676638 | 0.85558881 |
| V50-ethyl.hexanoate             | -0.04 | 0.74528263 | 0.85558881 |
| glycerol-isobutanol             | -0.04 | 0.76597702 | 0.85558881 |
| isobutanol-ethyl.acetate        | 0.03  | 0.77319092 | 0.85558881 |
| ethyl.hexanoate-ethyl.octanoate | -0.04 | 0.76056354 | 0.85558881 |
| T75-ethyl.butyrate              | -0.03 | 0.78936599 | 0.86266426 |
| population-isobutanol           | 0.03  | 0.80433033 | 0.87278398 |
| T75-ethyl.hexanoate             | 0.03  | 0.81629404 | 0.87952808 |
| Vmax-CO2produced                | 0.03  | 0.83214215 | 0.88415104 |
| acetate-isobutyl.acetate        | -0.03 | 0.82902882 | 0.88415104 |
| V50-isobutanol                  | -0.02 | 0.83989149 | 0.88623033 |
| DW-succinate                    | 0.02  | 0.85131283 | 0.8921292  |
| population-ethyl.octanoate      | 0.02  | 0.87610387 | 0.90239846 |
| V50-ethyl.butyrate              | 0.02  | 0.87115774 | 0.90239846 |
| succinate-isobutanol            | 0.02  | 0.87880634 | 0.90239846 |
| population-ethyl.hexanoate      | 0.01  | 0.91437689 | 0.93266443 |
| glycerol-ethyl.butyrate         | -0.01 | 0.94208523 | 0.95456318 |
| DW-ethyl.acetate                | 0.01  | 0.95594346 | 0.96223256 |
| ethyl.acetate-ethyl.octanoate   | 0.00  | 0.97025101 | 0.97025101 |

---
