# Supplementary material for: Phenotypic Landscape of Saccharomyces cerevisiae during Wine Fermentation: Evidence for Origin-Dependent Metabolic Traits
Source: PubMed Central journal article supplement (PMC3174997; doi:10.1371/journal.pone.0025147), 2011-09-16
Supplement: pone.0025147.s008.pdf [file pone.0025147.s008.pdf]

**Table S4. Descriptive statistics of the phenotypic variables regarding the origin of the strains.**

| Origin           | Baker                | Clinical            | Wine commercial     | Fermentation processes | Laboratory          | Natural            | Vineyard            | Total               |
|------------------|----------------------|---------------------|---------------------|------------------------|---------------------|--------------------|---------------------|---------------------|
| Cell number      | 69.98 ±24.2 (35%)    | 81.08 ±26.98 (33%)  | 119.11 ±27.3 (23%)  | 81.13 ±38.83 (48%)     | 87.1 ±25.36 (29%)   | 90.95 ±17.02 (19%) | 91.67 ±21.92 (24%)  | 89.71 ±27.86 (31%)  |
| Dry weight       | 3.01 ±1.28 (43%)     | 3.2 ±0.71 (22%)     | 3.64 ±0.5 (14%)     | 2.82 ±0.86 (31%)       | 2.35 ±0.7 (30%)     | 2.99 ±0.71 (24%)   | 3.84 ±0.86 (22%)    | 3.12 ±0.84 (27%)    |
| V <sub>max</sub> | 1.68 ±0.05 (3%)      | 1.72 ±0.24 (14%)    | 1.67 ±0.15 (9%)     | 1.44 ±0.59 (41%)       | 1.36 ±0.38 (28%)    | 1.72 ±0.2 (12%)    | 1.55 ±0.32 (20%)    | 1.61 ±0.33 (21%)    |
| CO <sub>2F</sub> | 96.66 ±12.34 (13%)   | 104.75 ±9.68 (9%)   | 112.22 ±2.81 (2%)   | 102.11 ±8.98 (9%)      | 100.87 ±11.89 (12%) | 101.01 ±9.38 (9%)  | 107.9 ±7.87 (7%)    | 103.69 ±9.8 (9%)    |
| T <sub>75</sub>  | 179.56 ±151.55 (84%) | 113.65 ±64.95 (57%) | 88.48 ±10.32 (12%)  | 178.22 ±116.47 (65%)   | 123.5 ±16.73 (14%)  | 99.62 ±18.52 (19%) | 109.04 ±27.11 (25%) | 120.93 ±70.08 (58%) |
| T <sub>50</sub>  | 86.92 ±38.1 (44%)    | 70.06 ±24.62 (35%)  | 61.02 ±4.6 (8%)     | 107.11 ±67.04 (63%)    | 81.73 ±14.26 (17%)  | 64.59 ±8.98 (14%)  | 66.84 ±16.45 (25%)  | 74.74 ±32.39 (43%)  |
| V <sub>50</sub>  | 0.55 ±0.31 (56%)     | 0.71 ±0.24 (33%)    | 0.84 ±0.11 (14%)    | 0.58 ±0.33 (57%)       | 0.65 ±0.15 (24%)    | 0.76 ±0.12 (16%)   | 0.7 ±0.2 (28%)      | 0.7 ±0.22 (31%)     |
| Ethanol          | 81.96 ±2.98 (4%)     | 85.24 ±1.91 (2%)    | 85.25 ±1.05 (1%)    | 86.07 ±2.22 (3%)       | 84.79 ±1.91 (2%)    | 84.4 ±1.97 (2%)    | 85.03 ±1.69 (2%)    | 84.83 ±2.1 (2%)     |
| Succinate        | 0.57 ±0.09 (16%)     | 0.76 ±0.29 (38%)    | 0.62 ±0.14 (22%)    | 0.6 ±0.19 (32%)        | 0.6 ±0.32 (53%)     | 0.67 ±0.24 (36%)   | 0.63 ±0.29 (47%)    | 0.65 ±0.24 (37%)    |
| Glycerol         | 6.66 ±0.8 (12%)      | 7.74 ±1.58 (20%)    | 7.02 ±0.44 (6%)     | 8.58 ±1.99 (23%)       | 7.25 ±0.73 (10%)    | 8.05 ±1.16 (14%)   | 7.16 ±0.68 (10%)    | 7.65 ±1.32 (17%)    |
| Acetate          | 0.54 ±0.24 (45%)     | 0.72 ±0.22 (31%)    | 0.62 ±0.14 (23%)    | 1.04 ±0.36 (35%)       | 1.06 ±0.43 (40%)    | 0.87 ±0.18 (21%)   | 0.93 ±0.39 (42%)    | 0.84 ±0.31 (37%)    |
| Pyruvate         | 0.11 ±0.02 (22%)     | 0.1 ±0.03 (26%)     | 0.12 ±0.02 (16%)    | 0.13 ±0.05 (40%)       | 0.12 ±0.04 (33%)    | 0.12 ±0.02 (21%)   | 0.12 ±0.03 (28%)    | 0.12 ±0.03 (28%)    |
| Isobutanol       | 41.64 ±14.16 (34%)   | 47.78 ±21.44 (45%)  | 51.96 ±7.82 (15%)   | 53.93 ±20.51 (38%)     | 38.97 ±14.97 (38%)  | 45.46 ±13.79 (30%) | 70.01 ±47.64 (68%)  | 49.55 ±22.74 (46%)  |
| Isobutyl acetate | 0.02 ±0.04 (173%)    | 0.06 ±0.07 (116%)   | 0.04 ±0.04 (104%)   | 0.06 ±0.09 (143%)      | 0.01 ±0.02 (178%)   | 0.03 ±0.06 (187%)  | 0.08 ±0.06 (81%)    | 0.04 ±0.06 (139%)   |
| Isoamyl alcohol  | 249.38 ±62.81 (25%)  | 241.79 ±85.46 (35%) | 242.29 ±63.56 (26%) | 220.81 ±95.06 (43%)    | 171.3 ±83.58 (49%)  | 227.39 ±55.5 (24%) | 193.77 ±86.71 (45%) | 222.52 ±76.07 (34%) |
| Isoamyl acetate  | 1.38 ±0.64 (46%)     | 2.29 ±2.02 (88%)    | 1.9 ±1.21 (64%)     | 1.76 ±1.32 (75%)       | 0.98 ±0.56 (57%)    | 0.97 ±0.7 (73%)    | 1.35 ±0.74 (55%)    | 1.5 ±1.25 (83%)     |
| Ethyl acetate    | 21.77 ±3.84 (18%)    | 25.08 ±10.27 (41%)  | 23.99 ±2.66 (11%)   | 22.74 ±7.1 (31%)       | 21.81 ±1.97 (9%)    | 18.55 ±3.85 (21%)  | 23.1 ±3.13 (14%)    | 22.07 ±6.03 (27%)   |
| Ethyl butyrate   | 0.11 ±0.03 (26%)     | 0.11 ±0.02 (22%)    | 0.18 ±0.13 (73%)    | 0.12 ±0.05 (43%)       | 0.34 ±0.22 (64%)    | 0.11 ±0.03 (33%)   | 0.13 ±0.04 (29%)    | 0.15 ±0.11 (78%)    |
| Ethyl hexanoate  | 0.19 ±0.11 (60%)     | 0.2 ±0.07 (32%)     | 0.21 ±0.11 (53%)    | 0.16 ±0.07 (43%)       | 0.09 ±0.04 (40%)    | 0.19 ±0.1 (55%)    | 0.19 ±0.07 (36%)    | 0.18 ±0.09 (50%)    |
| Ethyl octanoate  | 0.28 ±0.19 (69%)     | 0.21 ±0.16 (76%)    | 0.19 ±0.18 (95%)    | 0.2 ±0.23 (116%)       | 0.19 ±0.23 (122%)   | 0.3 ±0.23 (78%)    | 0.31 ±0.26 (84%)    | 0.24 ±0.21 (87%)    |

Mean ± standard deviation (CV%)
