# Supplementary material for: Phenotypic Landscape of Saccharomyces cerevisiae during Wine Fermentation: Evidence for Origin-Dependent Metabolic Traits
Source: PubMed Central journal article supplement (PMC3174997; doi:10.1371/journal.pone.0025147), 2011-09-16
Supplement: pone.0025147.s009.pdf [file pone.0025147.s009.pdf]

**Table S5. Comparison of the one-way ANOVAs and Kruskal-Wallis tests for the phenotypic variables.** The 72 strains were classified into 7 and 13 groups of origins. The p-values for each phenotypic parameter were reported in the table.

| Phenotypic variable | 7 groups                 |                | 13 groups                |                |
|---------------------|--------------------------|----------------|--------------------------|----------------|
|                     | ANOVA                    | Kruskal-Wallis | ANOVA                    | Kruskal-Wallis |
| Cell number         | 0.035                    | 0.10           | 0.15                     | 0.17           |
| Dry weight          | <b>0.004</b>             | <b>0.012</b>   | <b>0.002</b>             | <b>0.011</b>   |
| V <sub>max</sub>    | 0.06                     | 0.24           | 0.004                    | 0.15           |
| V <sub>50</sub>     | 0.09                     | 0.10           | 0.005                    | 0.06           |
| T <sub>75</sub>     | <b>0.02</b>              | <b>0.045</b>   | <b>0.0006</b>            | <b>0.028</b>   |
| T <sub>50</sub>     | 0.01                     | 0.055          | <b>4.10<sup>-5</sup></b> | <b>0.025</b>   |
| CO <sub>2F</sub>    | <b>0.02</b>              | <b>0.006</b>   | <b>0.0005</b>            | <b>0.0015</b>  |
| Glycerol            | <b>0.03</b>              | <b>0.012</b>   | <b>0.001</b>             | <b>0.023</b>   |
| Acetate             | <b>0.001</b>             | <b>0.0006</b>  | <b>0.04</b>              | <b>0.0085</b>  |
| Succinate           | 0.65                     | 0.39           | 0.46                     | 0.19           |
| Isobutanol          | 0.12                     | 0.39           | 0.22                     | 0.22           |
| Isobutyl acetate    | 0.34                     | 0.094          | 0.33                     | 0.14           |
| Isoamyl alcohol     | 0.34                     | 0.41           | 0.46                     | 0.53           |
| Isoamyl acetate     | 0.06                     | 0.086          | 0.16                     | 0.038          |
| Ethyl acetate       | 0.08                     | 0.0077         | 0.08                     | 0.0064         |
| Ethyl butyrate      | <b>3.10<sup>-6</sup></b> | <b>0.0037</b>  | <b>0.0004</b>            | <b>0.007</b>   |
| Ethyl hexanoate     | 0.09                     | 0.057          | <b>0.007</b>             | <b>0.009</b>   |
| Ethyl octanoate     | 0.71                     | 0.59           | 0.14                     | 0.25           |

No adjustment of multiplicity.

Variables significant at a 5% level for 7 groups and 13 groups of origins, with the 2 approaches were kept.
